# Supplementary material for: The stability of the acetic acid dimer in microhydrated environments and in aqueous solution
Source: Royal Society of Chemistry journal article supplement (doi:10.1039/c2cp23015a), 2012-01-01
Supplement: c2cp23015a.pdf [file c2cp23015a.pdf]

## The stability of the acetic acid dimer in microhydrated environment and in aqueous solution

### Supporting Information

Hasan Pašalić,<sup>a</sup> Daniel Tunega,<sup>a,b</sup> Adélia J. A. Aquino,<sup>a,b</sup> Georg Haberhauer,<sup>b</sup>  
Martin H. Gerzabek,<sup>b</sup> and Hans Lischka<sup>a,\*</sup>

<sup>a</sup> *Institute for Theoretical Chemistry, University of Vienna, Währinger Straße 17, 1090 Vienna, Austria,* <sup>b</sup> *Department of Forest and Soil Sciences, Institute of Soil Research, University of Natural Resources and Applied Life Sciences Vienna, Peter-Jordan-Straße 82, 1190 Vienna, Austria*

|                  |       |     |
|------------------|-------|-----|
| <b>Table S1</b>  | ..... | S2  |
| <b>Figure S1</b> | ..... | S3  |
| <b>Figure S2</b> | ..... | S4  |
| <b>Figure S3</b> | ..... | S5  |
| <b>Figure S4</b> | ..... | S6  |
| <b>Figure S5</b> | ..... | S7  |
| <b>Figure S6</b> | ..... | S8  |
| <b>Figure S7</b> | ..... | S9  |
| <b>Figure S8</b> | ..... | S10 |
| <b>Figure S9</b> | ..... | S11 |
| <b>Table S2</b>  | ..... | S12 |

**Table S1.** Interaction energies ( $\Delta E$ ), relative interaction energies ( $\Delta E_{\text{rel}}$ ), BSSE and the differential relative interaction energies ( $\Delta\Delta E_{\text{rel}}$ ) for the HAC dimer conformers (S1 to S4, and S6) at the MP2, PBE, and PBE-D levels using the TZVPP+sp basis set. BSSE corrected values are indicated by the respective index. All values are given in kcal/mol.

| MP2       |            |                           |                          |                                |      |                                 |
|-----------|------------|---------------------------|--------------------------|--------------------------------|------|---------------------------------|
| structure | $\Delta E$ | $\Delta E_{\text{rel}}^a$ | $\Delta E_{\text{BSSE}}$ | $\Delta E_{\text{BSSE,rel}}^a$ | BSSE | $\Delta\Delta E_{\text{rel}}^b$ |
| S1        | -16.51     | 0.00                      | -14.81                   | 0.00                           | 1.69 | 0.00                            |
| S2        | -7.91      | 8.60                      | -6.88                    | 7.93                           | 1.02 | 0.67                            |
| S3        | -9.11      | 7.40                      | -8.13                    | 6.69                           | 0.98 | 0.72                            |
| S4        | -6.44      | 10.07                     | -5.52                    | 9.30                           | 0.92 | 0.77                            |
| S6        | -4.43      | 12.08                     | -3.46                    | 11.35                          | 0.97 | 0.73                            |
| PBE       |            |                           |                          |                                |      |                                 |
| structure | $\Delta E$ | $\Delta E_{\text{rel}}^a$ | $\Delta E_{\text{BSSE}}$ | $\Delta E_{\text{BSSE,rel}}^a$ | BSSE | $\Delta\Delta E_{\text{rel}}^b$ |
| S1        | -17.25     | 0.00                      | -17.13                   | 0.00                           | 0.12 | 0.00                            |
| S2        | -7.26      | 9.99                      | -7.18                    | 9.95                           | 0.08 | 0.04                            |
| S3        | -8.65      | 8.60                      | -8.56                    | 8.57                           | 0.09 | 0.03                            |
| S4        | -5.30      | 11.95                     | -5.21                    | 11.93                          | 0.09 | 0.03                            |
| S6        | -3.16      | 14.09                     | -3.10                    | 14.04                          | 0.07 | 0.05                            |
| PBE-D     |            |                           |                          |                                |      |                                 |
| structure | $\Delta E$ | $\Delta E_{\text{rel}}^a$ | $\Delta E_{\text{BSSE}}$ | $\Delta E_{\text{BSSE,rel}}^a$ | BSSE | $\Delta\Delta E_{\text{rel}}^b$ |
| S1        | -19.37     | 0.00                      | -19.25                   | 0.00                           | 0.12 | 0.00                            |
| S2        | -9.01      | 10.37                     | -8.92                    | 10.32                          | 0.08 | 0.04                            |
| S3        | -10.27     | 9.10                      | -10.17                   | 9.07                           | 0.09 | 0.03                            |
| S4        | -7.01      | 12.36                     | -6.91                    | 12.34                          | 0.10 | 0.02                            |
| S6        | -4.27      | 15.11                     | -4.19                    | 15.05                          | 0.07 | 0.05                            |

<sup>a</sup>  $\Delta E_{\text{rel}}$  and  $\Delta E_{\text{BSSE,rel}}$  with respect to S1

<sup>b</sup>  $\Delta\Delta E_{\text{rel}} = \Delta E_{\text{rel}} - \Delta E_{\text{BSSE,rel}}$

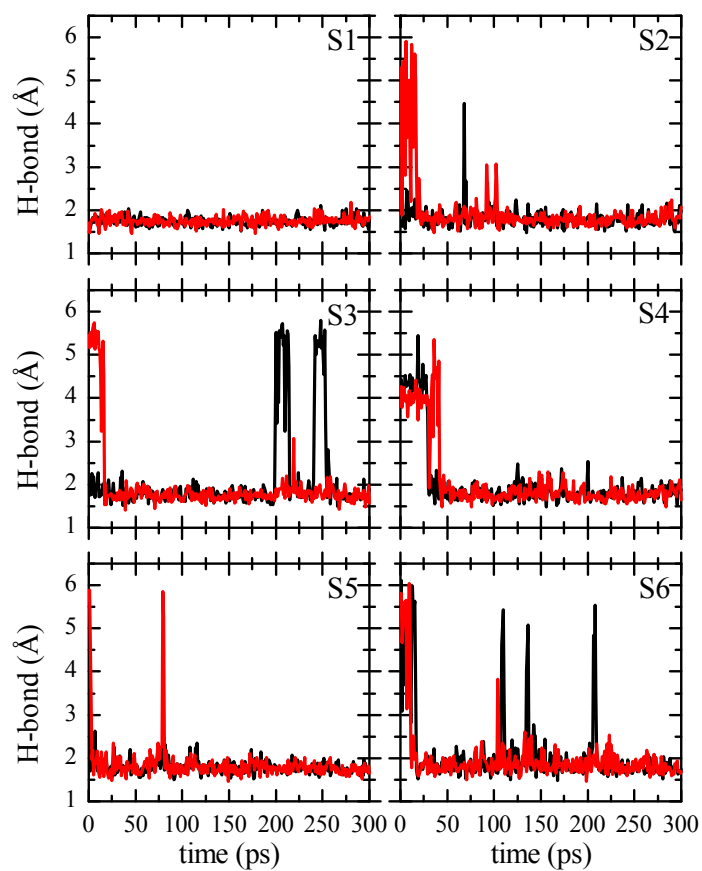

**Figure S1.** Time evolution during the initial 300 ps of the two C=O $\cdots$ H–O hydrogen bonds of the resulting cyclic dimer (indicated by the red and black lines) for the HAc dimer conformers (S1 to S6) from DFTB-D MD simulations.

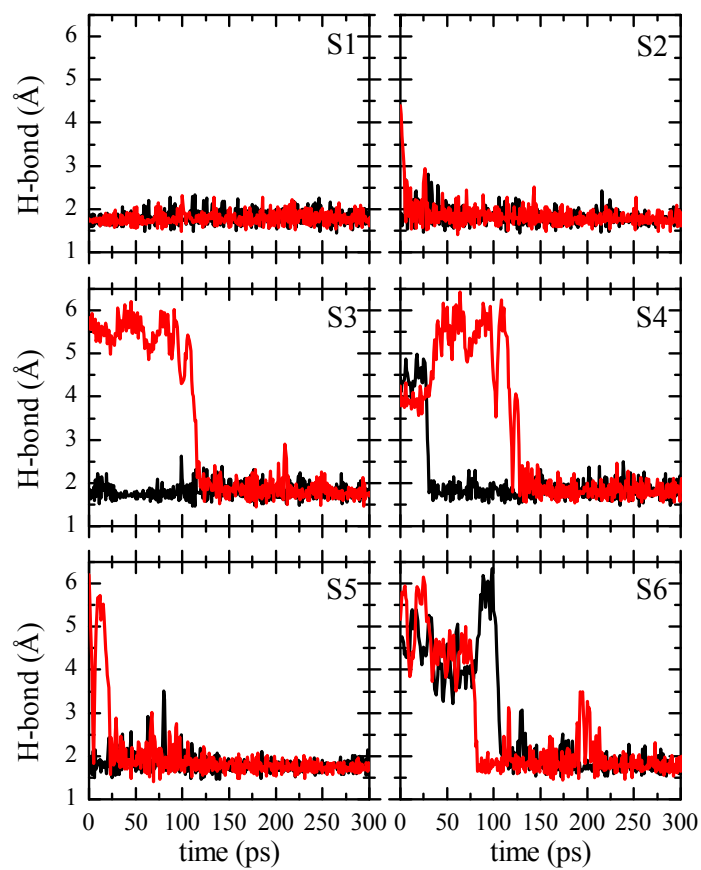

**Figure S2.** Time evolution during the initial 300 ps of the two C=O···H–O hydrogen bonds of the resulting cyclic dimer (indicated by the red and black lines) for the HAc dimer conformers (S1 to S6) from OPLS MD simulations.

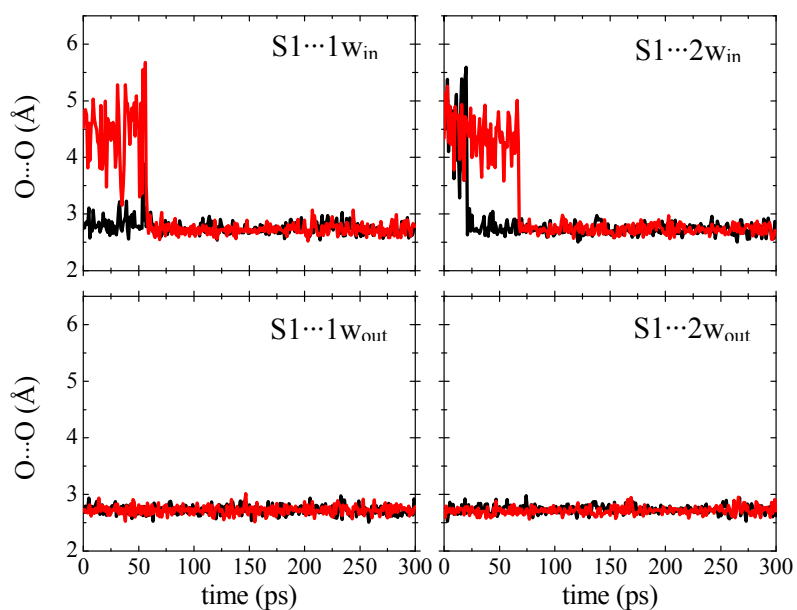

**Figure S3.** Time evolution during the initial 300 ps of the two intermolecular (C=)O...O(-H) distances of the cyclic dimer (indicated by the red and black lines) hydrated with one (1w) and two (2w) water molecules from DFTB-D MD simulations.

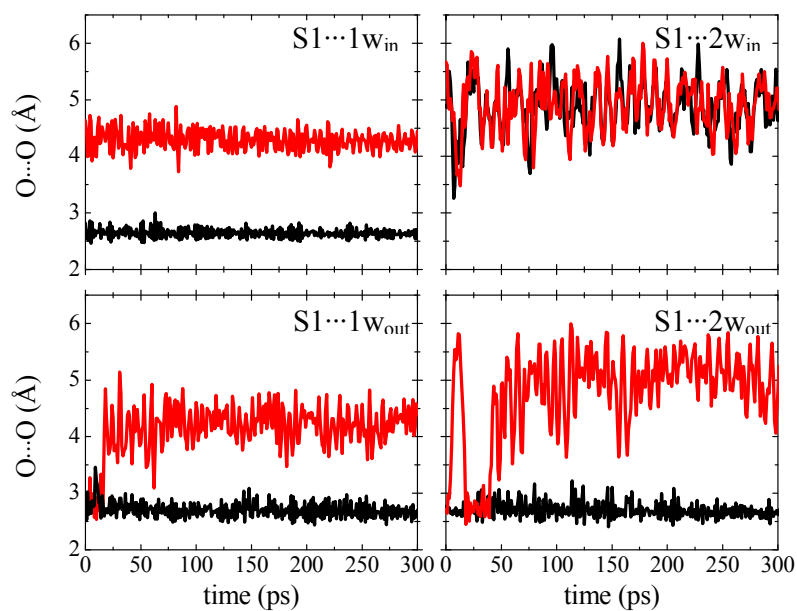

**Figure S4.** Time evolution during the initial 300 ps of the two intermolecular (C=O)⋯O(-H) distances of the cyclic dimer (indicated by the red and black lines) hydrated with one (1w) and two (2w) water molecules from OPLS MD simulations.

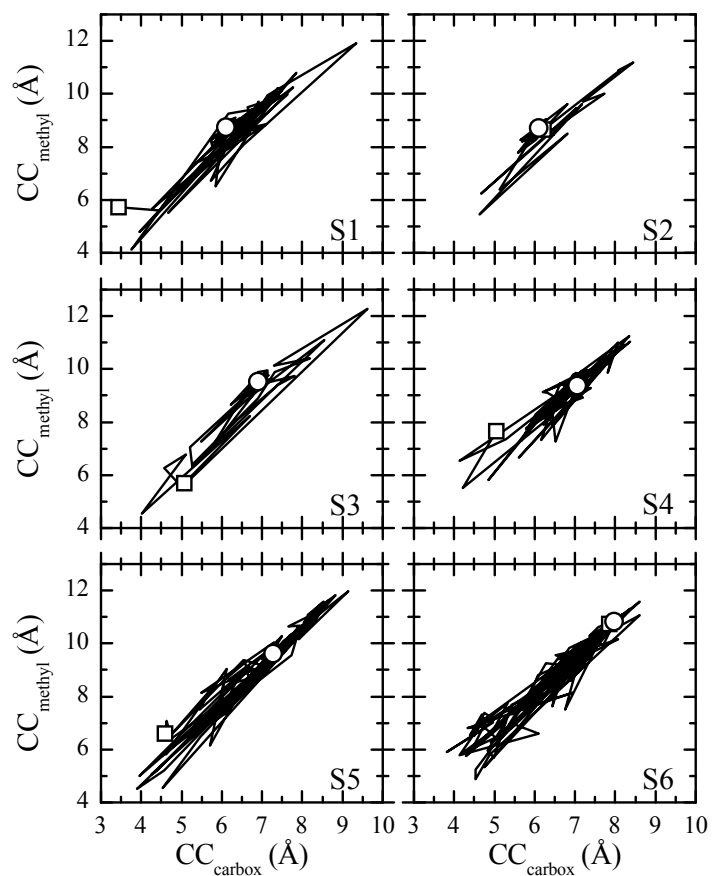

**Figure S5.** Correlation plots between the carboxyl ( $CC_{\text{carbox}}$ ) and methyl ( $CC_{\text{methyl}}$ ) CC distances for the HAC dimer conformers (S1 to S6) hydrated with four water molecules from OPLS MD simulations. Initial and final structures are indicated with squares and circles, respectively.

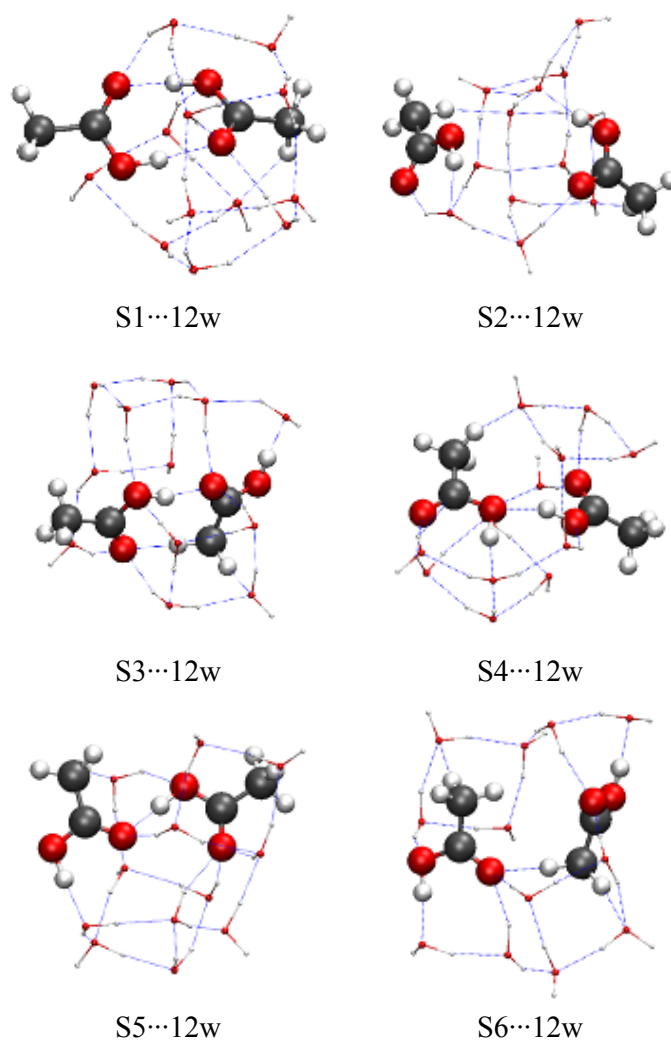

**Figure S6.** DFTB-D optimized structures of the microhydrated HAc dimer conformers (S1 to S6) with twelve water molecules (12w).



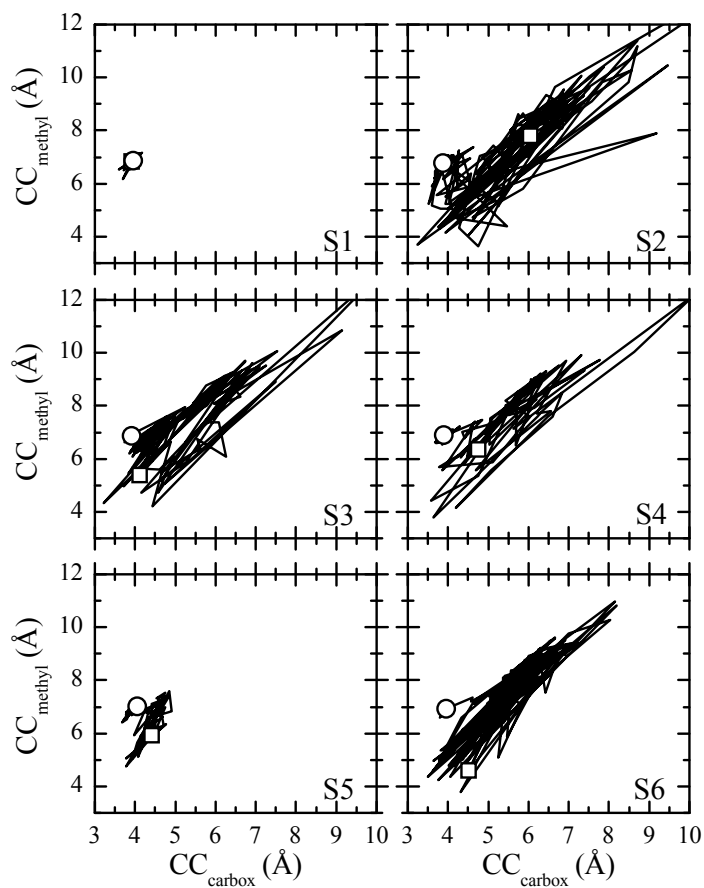

**Figure S7.** Correlation plots between the carboxyl ( $CC_{\text{carbox}}$ ) and methyl ( $CC_{\text{methyl}}$ ) CC distances for the HAc dimer conformers (S1 to S6) hydrated with twelve water molecules from DFTB-D MD simulations. Initial and final structures are indicated with squares and circles, respectively.

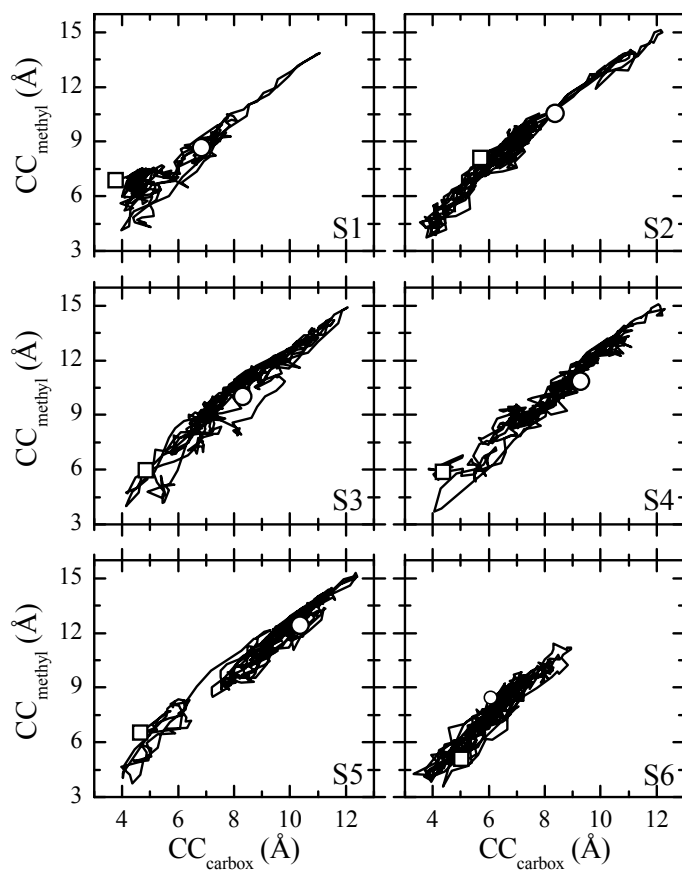

**Figure S8.** Correlation plots between the carboxyl ( $CC_{\text{carbox}}$ ) and methyl ( $CC_{\text{methyl}}$ ) CC distances for the HAC dimer conformers (S1 to S6) hydrated with twelve water molecules from OPLS MD simulations. Initial and final structures are indicated with squares and circles, respectively.

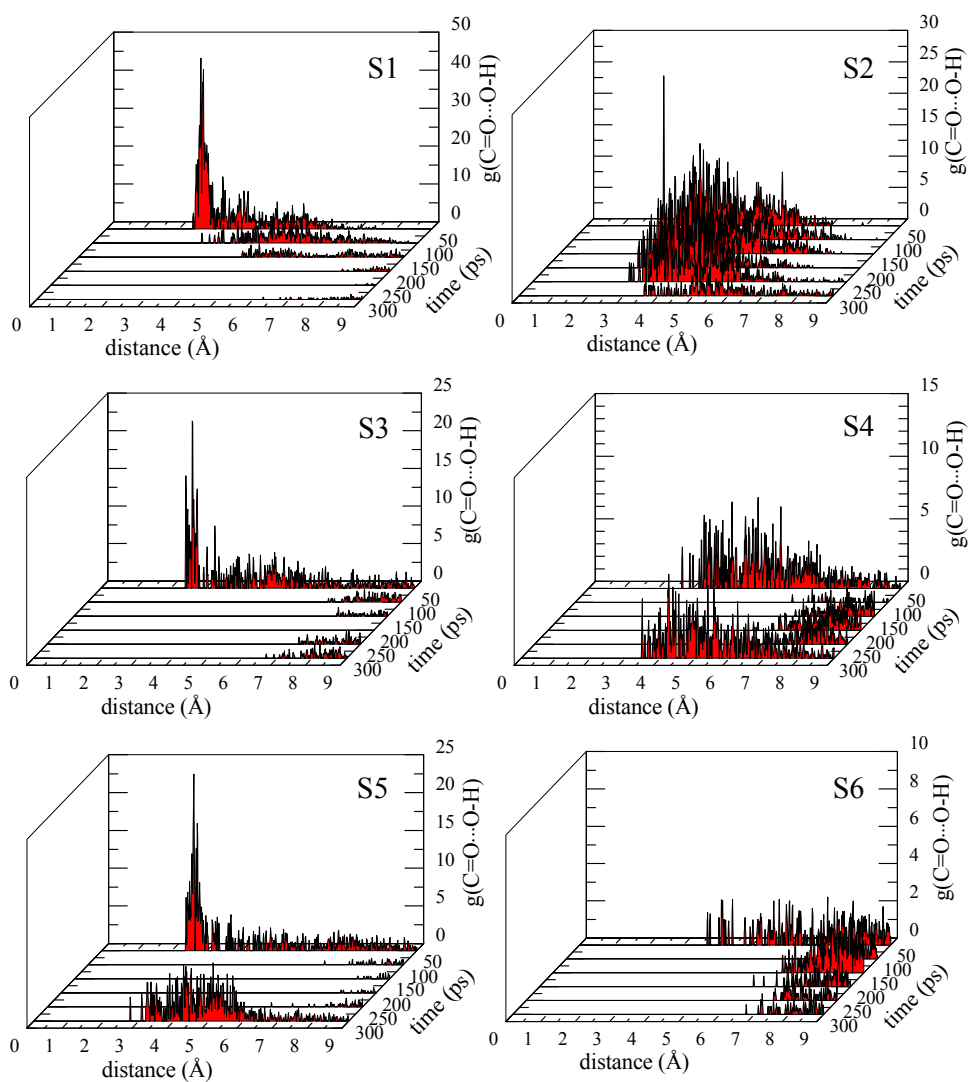

**Figure S9.** Radial distribution functions (RDFs) of intermolecular  $(\text{C}=\text{O})\cdots\text{O}(-\text{H})$  distances for the HAC dimer conformers (S1 to S6) in aqueous solution from OPLS MD simulations.

**Table S2.** Cartesian coordinates (Å) for the micorhydrated HAc dimer conformers (S1 to S6) with four water molecules (4w) optimized at the DFTB-D level and total energies (Hartree)

S1...4w

|   |            |             |             |
|---|------------|-------------|-------------|
| C | 7.72060919 | 1.22049403  | -1.25821805 |
| C | 6.31488991 | 0.73217702  | -1.19848597 |
| O | 5.80663395 | 0.20317100  | -0.19333500 |
| O | 5.58784723 | 0.91834003  | -2.31138611 |
| H | 7.70117283 | 2.31514001  | -1.10468102 |
| H | 8.16796303 | 1.01999497  | -2.23814702 |
| H | 8.33183861 | 0.76405001  | -0.47339201 |
| H | 4.62670803 | 0.68523002  | -2.14071798 |
| C | 1.03633404 | -0.47433701 | -0.75542003 |
| C | 2.45090103 | 0.00560600  | -0.78300601 |
| O | 2.93658710 | 0.68453300  | -1.69590497 |
| O | 3.20313311 | -0.34984899 | 0.27901700  |
| H | 0.44080800 | 0.01645400  | -1.53095603 |
| H | 0.58062398 | -0.28832299 | 0.22413900  |
| H | 1.01528299 | -1.55761194 | -0.93121201 |
| H | 4.16449785 | -0.06996900 | 0.12402300  |
| O | 3.77286005 | 3.33477497  | -0.97325599 |
| H | 3.30875111 | 3.39494205  | -0.12512200 |
| H | 3.48529506 | 2.50221395  | -1.39542794 |
| O | 6.52900314 | 3.98653793  | -0.81405300 |
| H | 6.62095308 | 4.83618116  | -1.27077794 |
| H | 5.57914782 | 3.74399805  | -0.86658502 |
| O | 6.12079811 | -2.62823892 | -0.29670200 |
| H | 6.53020906 | -2.97547007 | 0.50976002  |
| H | 6.08697605 | -1.65616202 | -0.20424600 |
| O | 3.34727001 | -3.14822888 | -0.54245400 |
| H | 4.31994915 | -3.18637705 | -0.64463401 |
| H | 3.18302703 | -2.47596502 | 0.13887399  |

Energy: -39.569501

S2...4w

|   |             |            |             |
|---|-------------|------------|-------------|
| C | -5.58610296 | 2.35718799 | 0.32617801  |
| C | -5.37168407 | 3.46854401 | 1.31083906  |
| O | -5.66405010 | 4.64918613 | 1.08051598  |
| O | -4.83202314 | 3.10279703 | 2.48406291  |
| H | -5.79202318 | 1.41001201 | 0.83578801  |
| H | -4.68264389 | 2.22138095 | -0.28266999 |
| H | -6.41360998 | 2.59227991 | -0.35157999 |
| H | -4.73036289 | 3.92131805 | 3.08956909  |
| C | -5.42332077 | 8.81601143 | 3.13236403  |
| C | -6.72756481 | 8.09827328 | 2.96916389  |
| O | -7.63295794 | 8.43827248 | 2.22575593  |
| O | -6.85487509 | 6.96138287 | 3.74120307  |
| H | -5.45116997 | 9.78837013 | 2.63088298  |
| H | -5.19323778 | 8.96688366 | 4.19398022  |
| H | -4.61175013 | 8.21611023 | 2.69189191  |
| H | -7.77978802 | 6.58010292 | 3.55174398  |
| O | -9.29827785 | 6.33102417 | 2.87888098  |
| H | -9.25275517 | 7.21139002 | 2.45533609  |
| H | -9.15185165 | 5.67668819 | 2.15627909  |
| O | -8.48060799 | 4.52943707 | 0.93580401  |

|   |             |            |            |
|---|-------------|------------|------------|
| H | -8.54052544 | 3.63872504 | 1.31256497 |
| H | -7.52935696 | 4.75025320 | 0.86698401 |
| O | -3.69914198 | 6.59071493 | 1.67414606 |
| H | -2.91811204 | 6.49054289 | 1.10861099 |
| H | -4.41694593 | 6.04801798 | 1.28455198 |
| O | -4.54936695 | 5.31126881 | 3.96262598 |
| H | -3.99498510 | 5.85586596 | 3.36235404 |
| H | -5.40200806 | 5.79106092 | 4.03567314 |

Energy: -39.573983

S3\*\*\*4w

|   |              |             |            |
|---|--------------|-------------|------------|
| C | -7.37396383  | 4.38112497  | 1.63612998 |
| C | -5.88688087  | 4.29417706  | 1.51188195 |
| O | -5.10248518  | 4.91718388  | 2.24708605 |
| O | -5.42742920  | 3.48167491  | 0.55058300 |
| H | -7.67091894  | 5.40445614  | 1.91157806 |
| H | -7.86771202  | 4.08691311  | 0.70404601 |
| H | -7.71796799  | 3.70550609  | 2.43088198 |
| H | -4.41314316  | 3.50579906  | 0.51027000 |
| C | -6.69999886  | 9.48484516  | 3.30863190 |
| C | -6.63515615  | 8.03171539  | 2.95168304 |
| O | -7.56954288  | 7.37210512  | 2.51144099 |
| O | -5.41034794  | 7.45628405  | 3.14471698 |
| H | -6.18465090  | 10.07931137 | 2.54246211 |
| H | -6.19810295  | 9.67212677  | 4.26502085 |
| H | -7.73786783  | 9.82588768  | 3.37153292 |
| H | -5.43995714  | 6.48640490  | 2.86282206 |
| O | -9.95010281  | 8.82245255  | 3.08832192 |
| H | -10.76096058 | 8.48094559  | 2.68342495 |
| H | -9.22952366  | 8.20893478  | 2.83876610 |
| O | -2.79264593  | 8.01555920  | 2.06224799 |
| H | -2.28476501  | 8.55133533  | 2.68948293 |
| H | -3.70358706  | 7.95541096  | 2.40737700 |
| O | -2.28548598  | 5.27828693  | 2.36945391 |
| H | -2.25998712  | 6.23130608  | 2.13120604 |
| H | -3.21421504  | 5.09875488  | 2.61766911 |
| O | -2.72888708  | 3.51523304  | 0.34976000 |
| H | -2.41601205  | 4.21760607  | 0.97577500 |
| H | -2.26499104  | 2.69935393  | 0.59554303 |

Energy: -39.572617

S4\*\*\*4w

|   |             |            |             |
|---|-------------|------------|-------------|
| C | -6.20215511 | 3.73783994 | -1.47378004 |
| C | -6.80634022 | 4.98641300 | -0.91331297 |
| O | -7.83947706 | 5.04667807 | -0.26168200 |
| O | -6.09315920 | 6.13012505 | -1.17845905 |
| H | -6.89989519 | 2.89853191 | -1.39624000 |
| H | -5.92468596 | 3.88282108 | -2.52452302 |
| H | -5.28706121 | 3.48517489 | -0.92218798 |
| H | -6.55889797 | 6.91502094 | -0.75851703 |
| C | -9.10679436 | 7.66186285 | 0.92848402  |
| C | -7.79100323 | 8.32483673 | 1.18433905  |
| O | -7.41326523 | 8.75815582 | 2.26237011  |
| O | -6.98347616 | 8.40886211 | 0.07052600  |
| H | -9.71148491 | 7.62600279 | 1.83974695  |
| H | -9.66287899 | 8.20341110 | 0.15301500  |
| H | -8.93604660 | 6.63716793 | 0.56306398  |
| H | -6.08954287 | 8.85795975 | 0.31132901  |
| O | -9.16746044 | 2.54100108 | -0.57643402 |

|   |             |             |             |
|---|-------------|-------------|-------------|
| H | -8.85690403 | 3.44762993  | -0.38072100 |
| H | -9.91570663 | 2.36769009  | 0.01365600  |
| O | -4.85780716 | 9.31201744  | 3.27541304  |
| H | -4.90868807 | 10.17276478 | 3.71827507  |
| H | -5.78125811 | 9.03701687  | 3.09123492  |
| O | -4.53735495 | 9.31274414  | 0.55281800  |
| H | -4.45691109 | 9.39391232  | 1.53487301  |
| H | -3.99300504 | 8.53618336  | 0.28776801  |
| O | -3.43111110 | 6.91656590  | -0.39194000 |
| H | -2.82043600 | 6.99121380  | -1.14026403 |
| H | -4.24829578 | 6.50098896  | -0.72565299 |

Energy: -39.569114

S5\*\*\*4w

|   |             |             |             |
|---|-------------|-------------|-------------|
| C | -6.66470003 | 6.30116510  | -0.56788802 |
| C | -5.38460684 | 6.98528385  | -0.93111402 |
| O | -4.88660622 | 7.91182518  | -0.26497000 |
| O | -4.77457809 | 6.53179598  | -2.02950692 |
| H | -7.47006083 | 7.03758383  | -0.39877799 |
| H | -6.53165579 | 5.74023485  | 0.36677799  |
| H | -6.97327518 | 5.59974623  | -1.34949505 |
| H | -3.90323710 | 7.04587317  | -2.19087005 |
| C | -7.04417181 | 12.09360981 | 1.14995301  |
| C | -6.17698383 | 11.04953671 | 0.51104498  |
| O | -5.40378284 | 11.25898933 | -0.41309300 |
| O | -6.32360697 | 9.79953861  | 1.04406798  |
| H | -8.09783363 | 11.91059875 | 0.90230501  |
| H | -6.95081282 | 12.06064224 | 2.24186492  |
| H | -6.77414417 | 13.09385872 | 0.79809803  |
| H | -5.72804022 | 9.14426994  | 0.55515403  |
| O | -8.73896027 | 8.47364902  | 0.26595300  |
| H | -9.26501942 | 8.16189766  | 1.01699102  |
| H | -8.02380085 | 9.03084660  | 0.62712801  |
| O | -2.13377094 | 8.46366596  | 0.24418600  |
| H | -3.06158710 | 8.16976166  | 0.33120000  |
| H | -2.18495488 | 9.35474300  | -0.15268400 |
| O | -2.49025202 | 7.86434412  | -2.37560201 |
| H | -2.06995296 | 7.78012514  | -1.48900795 |
| H | -2.71792793 | 8.81738186  | -2.43241596 |
| O | -2.98688412 | 10.49300385 | -1.57672596 |
| H | -3.88236594 | 10.62973785 | -1.19702494 |
| H | -2.68792605 | 11.35938931 | -1.89374900 |

Energy: -39.575095

S6\*\*\*4w

|   |             |             |             |
|---|-------------|-------------|-------------|
| C | -3.39038992 | 12.45828724 | -0.84551501 |
| C | -3.84355688 | 13.78937721 | -0.33286300 |
| O | -4.33980417 | 13.96162319 | 0.78488702  |
| O | -3.66798806 | 14.82375526 | -1.18404400 |
| H | -2.47698998 | 12.15025425 | -0.31933799 |
| H | -3.17182112 | 12.49905491 | -1.91773999 |
| H | -4.15789890 | 11.68973827 | -0.65362501 |
| H | -4.00304794 | 15.68465424 | -0.77387500 |
| C | -6.41972685 | 11.79282761 | 1.57073402  |
| C | -5.98844481 | 10.45313454 | 1.06111395  |
| O | -5.44857121 | 10.27629948 | -0.03539800 |
| O | -6.24045086 | 9.41595459  | 1.88924694  |
| H | -5.63893223 | 12.54863930 | 1.38423204  |
| H | -6.64681911 | 11.75538158 | 2.64128208  |

|   |             |             |             |
|---|-------------|-------------|-------------|
| H | -7.32547617 | 12.11550522 | 1.03984201  |
| H | -5.91904020 | 8.54758358  | 1.48385203  |
| O | -4.47944307 | 17.21376038 | -0.14957599 |
| H | -3.75618410 | 17.85320282 | -0.05600400 |
| H | -4.78716707 | 16.99608040 | 0.76397699  |
| O | -5.06209803 | 16.16867828 | 2.30990696  |
| H | -5.99354315 | 16.02058411 | 2.53478694  |
| H | -4.72861385 | 15.32486153 | 1.93171704  |
| O | -4.80445623 | 8.05219841  | -1.57139802 |
| H | -3.86300397 | 8.15499210  | -1.77907801 |
| H | -5.10088110 | 8.90752506  | -1.18793702 |
| O | -5.47848320 | 7.00656080  | 0.86380601  |
| H | -5.14535284 | 7.21963596  | -0.04194600 |
| H | -6.22151613 | 6.39324617  | 0.75175202  |

Energy: -39.574476
